# Supplementary material for: Multi-decadal fluctuations in root zone storage capacity through vegetation adaptation to hydro-climatic variability have minor effects on the hydrological response in the Neckar River basin, Germany
Source: Copernicus journal article supplement (doi:10.5194/hess-28-4011-2024), 2024-09-03
Supplement: Supplementary file 1 [file hess-28-4011-2024-supplement.pdf]

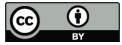

*Supplement of*

**Multi-decadal fluctuations in root zone storage capacity through vegetation adaptation to hydro-climatic variability have minor effects on the hydrological response in the Neckar River basin, Germany**

**Siyuan Wang et al.**

*Correspondence to:* Siyuan Wang (s.wang-9@tudelft.nl)

The copyright of individual parts of the supplement might differ from the article licence.

Table S1. Water balance and constitutive equations of distributed hydrological model

| Reservoirs            | Water balance                                                         | Constitutive equations                                                                    |
|-----------------------|-----------------------------------------------------------------------|-------------------------------------------------------------------------------------------|
| Interception          | $\frac{ds_i}{dt} = P_{rain} - E_i - P_{re}$ (S4)                      | $P_{rain} = P, \text{ when } T > T_t$ (S10)                                               |
|                       |                                                                       | $E_i = \min(E_p, S_i/dt)$ (S11)                                                           |
|                       |                                                                       | $P_{re} = \max((S_i - S_{imax})/dt, 0)$ (S12)                                             |
| Snow                  | $\frac{ds_{snow}}{dt} = P_{snow} - M_{snow}$ (S5)                     | $P_{snow,e} = P, \text{ when } T_e \leq T_t$ (S13)                                        |
|                       |                                                                       | $P_{snow} = \sum P_{snow,e} \cdot W_e$ (S14)                                              |
|                       |                                                                       | $M_{snow,e} = \min(C_{melt} * (T_e - T_t), S_{snow,e}/dt), \text{ when } T_e > T_t$ (S15) |
|                       |                                                                       | $M_{snow} = \sum M_{snow,e} \cdot W_e$ (S16)                                              |
| Unsaturated reservoir | Forest/ Grass:<br>$\frac{ds_u}{dt} = P_e - E_a - R_u - R_{perc}$ (S6) | $P_e = P_{re} + M_{snow}$ (S17)                                                           |
|                       |                                                                       | $\rho = S_u/S_{umax}$ (S18)                                                               |
|                       | Wetland:<br>$\frac{ds_u}{dt} = P_e - E_a - R_u + R_{cap}$ (S7)        | $E_a = (E_p - E_i) * \min(\rho/C_a, 1)$ (S19)                                             |
|                       |                                                                       | $C_r = 1 - (1 - \rho)^\gamma$ (S20)                                                       |
|                       |                                                                       | $R_u = (1 - C_r) * P_e$ (S21)                                                             |
|                       |                                                                       | $R_{perc} = \min(c_{pmax} * \rho, S_u/dt)$ (S22)                                          |
|                       |                                                                       | $R_{cap} = \min(c_{pmax} * (1 - \rho), \frac{S_s}{dt} * P_{HRU})$ (S23)                   |
|                       |                                                                       | $R_{pref} = (1 - D) * R_u$ (S24)                                                          |
| Fast reservoir        | $\frac{ds_f}{dt} = R_f - Q_f$ (S8)                                    | Forest/ Grass:<br>$R_f = D * R_u$ (S25)                                                   |
|                       |                                                                       | Wetland:<br>$R_f = R_u$ (S26)                                                             |
|                       |                                                                       | $Q_f = K_f * S_f$ (S27)                                                                   |
| Slow reservoir        | $\frac{ds_s}{dt} = R_{perctot} + R_{preftot} - R_{captot} - Q_s$ (S9) | $R_{perctot} = \sum R_{perc} \cdot P_{HRU}$ (S28)                                         |
|                       |                                                                       | $R_{preftot} = \sum R_{pref} \cdot P_{HRU}$ (S29)                                         |
|                       |                                                                       | $R_{captot} = \sum R_{cap} \cdot P_{HRU}$ (S30)                                           |
|                       |                                                                       | $Q_s = K_s * S_s$ (S31)                                                                   |

Table S2. Model parameters and their prior distributions in Borg\_MOEA method.

|           | Parameters  | Unit                | Description                                          | Parameter Constraints   | Prior distributions | References                                  |
|-----------|-------------|---------------------|------------------------------------------------------|-------------------------|---------------------|---------------------------------------------|
| Global    | $T_t$       | °C                  | Threshold temperature to split snowfall and rainfall |                         | -2.5-2.5            | (Gao et al., 2014; Hrachowitz et al., 2013) |
|           | $C_{melt}$  | mm °C <sup>-1</sup> | Melt factor                                          |                         | 1-5                 | (Prenner et al., 2018)                      |
|           | $C_a$       | -                   | Evapotranspiration coefficient                       |                         | 0.1-0.7             | (Gao et al., 2017)                          |
|           | $K_s$       | d <sup>-1</sup>     | Recession coefficient of slow response reservoir     |                         | 0.002-0.2           | (Prenner et al., 2018)                      |
| Forest    | $S_{imaxF}$ | mm                  | Interception capacity                                | $S_{imaxF} > S_{imaxG}$ | 0.1-5               | (Gao et al., 2014)                          |
|           | $S_{umaxF}$ | mm                  | Root zone storage capacity                           | $S_{umaxF} > S_{umaxG}$ | 50-500              | (Gao et al., 2014)                          |
|           | $\gamma_F$  | -                   | Shape parameter                                      |                         | 0.1-5               | (Gao et al., 2014)                          |
|           | $D$         | -                   | Splitter to fast and slow response reservoirs        |                         | 0-1                 | (Gao et al., 2014)                          |
|           | $C_{pmaxF}$ | mm d <sup>-1</sup>  | Percolation capacity                                 |                         | 0.1-4               | (Prenner et al., 2018)                      |
|           | $K_{fF}$    | d <sup>-1</sup>     | Recession coefficient of fast response reservoir     | $K_{fF} > K_s$          | 0.2-5               | (Hrachowitz et al., 2013)                   |
| Grassland | $S_{imaxG}$ | mm                  | Interception capacity                                |                         | 0.1-5               | (Gao et al., 2014)                          |
|           | $S_{umaxG}$ | mm                  | Root zone storage capacity                           | $S_{umaxG} > S_{umaxW}$ | 50-500              | (Gao et al., 2014)                          |
|           | $\gamma_G$  | -                   | Shape parameter                                      |                         | 0.1-5               | (Gao et al., 2014)                          |
|           | $C_{pmaxG}$ | mm d <sup>-1</sup>  | Percolation capacity                                 |                         | 0.1-4               | (Prenner et al., 2018)                      |
|           | $K_{fG}$    | d <sup>-1</sup>     | Recession coefficient of fast response reservoir     | $K_{fG} > K_s$          | 0.2-5               | (Hrachowitz et al., 2013)                   |
| Wetland   | $S_{umaxW}$ | mm                  | Root zone storage capacity                           | $S_{umaxW} < S_{umaxG}$ | 50-500              | (Gao et al., 2014)                          |
|           | $\gamma_W$  | -                   | Shape parameter                                      |                         | 0.1-5               | (Gao et al., 2014)                          |
|           | $C_{rmax}$  | mm d <sup>-1</sup>  | Percolation capacity                                 |                         | 0.1-4               | (Gao et al., 2014)                          |

Table S3. The prior parameter ranges and the ranges of the pareto optimal solutions from two calibration cases (Scenarios 1 – 2) are shown here.

| Parameter                                        | Prior range | Posterior distribution |                   |                   |                  |                  |
|--------------------------------------------------|-------------|------------------------|-------------------|-------------------|------------------|------------------|
|                                                  |             | Scenario 1             |                   | Scenario2         |                  |                  |
|                                                  |             | T (1953-2022)          | t1 (1953-1972)    | t2 (1973-1992)    | t3 (1993-2012)   | t4 (2013-2022)   |
| $T_t$ (°C)                                       | -2.5-2.5    | 0.40(-0.80-0.64)       | -0.08(-2.46-0.88) | -0.08(-2.19-0.97) | 0.19(-1.31-1.69) | 1.18(-1.42-2.49) |
| $C_{melt}$ (mm°C <sup>-1</sup> d <sup>-1</sup> ) | 1-5         | 4.46(3.14-4.87)        | 2.75(1.79-4.35)   | 1.77(1.29-4.55)   | 1.97(1.58-4.30)  | 3.08(1.24-3.95)  |
| $C_a$ (-)                                        | 0.1-0.7     | 0.66(0.43-0.68)        | 0.51(0.41-0.62)   | 0.60(0.49-0.67)   | 0.61(0.39-0.67)  | 0.67(0.42-0.63)  |
| $K_s$ (d <sup>-1</sup> )                         | 0.002-0.2   | 0.03(0.02-0.07)        | 0.03(0.03-0.07)   | 0.05(0.03-0.15)   | 0.04(0.03-0.18)  | 0.03(0.01-0.05)  |
| $S_{maxF}$ (mm)                                  | 0.1-5       | 1.55(1.55-2.87)        | 2.54(2.00-4.82)   | 2.43(1.93-4.76)   | 1.82(1.79-4.69)  | 3.03(1.75-3.82)  |
| $S_{umaxF}$ (mm)                                 | 50-200      | 158(138-167)           | 148(114-165)      | 149(130-174)      | 120(100-159)     | 125(122-169)     |
| $\gamma_F$ (-)                                   | 0.1-5       | 3.43(0.58-4.51)        | 1.02(1.02-4.18)   | 2.02(1.22-4.46)   | 0.69(0.39-4.14)  | 0.44(0.54-3.43)  |
| $D$ (-)                                          | 0-1         | 0.09(0.04-0.21)        | 0.06(0.01-0.43)   | 0.33(0.07-0.77)   | 0.41(0.10-0.72)  | 0.27(0.25-0.97)  |
| $C_{pmaxF}$ (mm d <sup>-1</sup> )                | 0.1-4       | 2.15(1.97-2.83)        | 1.83(0.53-2.53)   | 0.21(0.92-2.95)   | 0.92(0.91-3.47)  | 0.12(0.35-3.42)  |
| $K_{fF}$ (d <sup>-1</sup> )                      | 0.2-5       | 0.41(1.48-3.19)        | 0.62(0.22-4.45)   | 0.30(0.30-4.94)   | 0.25(0.23-4.63)  | 0.53(0.21-3.95)  |
| $S_{maxG}$ (mm)                                  | 0.1-5       | 0.97(0.70-1.30)        | 1.06(0.19-1.25)   | 1.24(0.44-1.50)   | 0.93(0.09-1.25)  | 0.41(0.01-1.02)  |
| $S_{umaxG}$ (mm)                                 | 50-200      | 94.6(71.4-123)         | 68.0(66.2-124)    | 115(88.5-123)     | 93.2(67.9-119)   | 102(86.4-141)    |
| $\gamma_G$ (-)                                   | 0.1-5       | 4.61(0.33-4.34)        | 1.93(0.77-4.48)   | 0.87(0.11-1.89)   | 2.76(0.57-4.52)  | 4.58(0.62-4.04)  |
| $C_{pmaxG}$ (mm d <sup>-1</sup> )                | 0.1-4       | 0.87(0.87-3.37)        | 1.85(1.76-3.67)   | 3.14(2.83-3.78)   | 3.11(2.61-3.90)  | 2.62(1.66-3.96)  |
| $K_{fG}$ (d <sup>-1</sup> )                      | 0.2-5       | 0.22(0.22-1.53)        | 0.23(0.21-2.12)   | 0.25(0.23-4.56)   | 0.23(0.23-4.98)  | 0.21(0.24-4.11)  |
| $S_{umaxW}$ (mm)                                 | 50-200      | 60.9(49.1-68.0)        | 55.0(27.2-69.0)   | 68.6(38.1-66.7)   | 51.3(20.3-58.9)  | 68.5(14.5-73.5)  |
| $\gamma_W$ (-)                                   | 0.1-5       | 0.35(0.14-2.40)        | 0.50(0.37-4.46)   | 3.84(0.22-4.65)   | 1.26(0.17-4.73)  | 0.63(0.09-3.66)  |
| $C_{rmax}$ (mm d <sup>-1</sup> )                 | 0-4         | 1.05(0.76-2.17)        | 0.98(0.32-2.80)   | 1.13(0.41-2.11)   | 1.33(0.09-2.51)  | 0.03(2.34-3.76)  |

Table S4. The performance metrics for the most balanced solution (out of the basket) and the the 5<sup>th</sup>-95<sup>th</sup> percentile of all performance metrics (inside of the basket) for the full set of pareto optimal solutions for the multi-objective calibration cases (Scenarios 1 – 2) with  $S_{\text{umax,ca}}$  are shown here.

|                      | Scenario 1      |                 |                 |                 |                 | Scenario 2       |                 |                  |                  |
|----------------------|-----------------|-----------------|-----------------|-----------------|-----------------|------------------|-----------------|------------------|------------------|
|                      | T (1953-2022)   | t1 (1953-1972)  | t2 (1973-1992)  | t3 (1993-2012)  | t4 (2013-2022)  | t1 (1953-1972)   | t2 (1973-1992)  | t3 (1993-2012)   | t4 (2013-2022)   |
| $NSE_Q$              | 0.59(0.06-0.55) | 0.60(0.09-0.57) | 0.58(0.07-0.55) | 0.60(0.09-0.56) | 0.57(0.11-0.53) | 0.60(-0.16-0.57) | 0.57(0.02-0.54) | 0.59(-0.32-0.52) | 0.56(-0.61-0.50) |
| $NSE_{\log(Q)}$      | 0.67(0.34-0.64) | 0.65(0.36-0.62) | 0.68(0.37-0.65) | 0.66(0.30-0.63) | 0.70(0.32-0.66) | 0.69(0.23-0.62)  | 0.65(0.30-0.59) | 0.63(-0.33-0.53) | 0.72(-0.77-0.66) |
| $NSE_{FDC(\log(Q))}$ | 0.96(0.92-0.99) | 0.93(0.89-0.98) | 0.95(0.90-0.99) | 0.98(0.93-0.99) | 0.97(0.91-0.98) | 0.96(0.94-0.99)  | 0.98(0.88-0.99) | 0.98(0.58-0.99)  | 0.97(0.16-0.99)  |
| $NSE_{Cr}$           | 0.90(0.86-0.91) | 0.86(0.84-0.88) | 0.91(0.89-0.93) | 0.90(0.88-0.92) | 0.91(0.87-0.91) | 0.86(0.84-0.89)  | 0.91(0.86-0.93) | 0.90(0.87-0.92)  | 0.89(0.63-0.92)  |
| $NSE_{AC}$           | 0.99(0.56-0.97) | 0.94(0.45-0.96) | 0.98(0.55-0.96) | 0.98(0.62-0.98) | 0.82(0.11-0.91) | 0.98(0.21-0.94)  | 0.87(0.47-0.96) | 0.95(0.27-0.94)  | 0.90(0.07-0.97)  |
| $RE_{Cr,summer}$     | 0.83(0.82-0.89) | 0.80(0.79-0.90) | 0.83(0.81-0.90) | 0.85(0.83-0.89) | 0.85(0.83-0.87) | 0.90(0.81-0.90)  | 0.89(0.79-0.90) | 0.87(0.77-0.89)  | 0.84(0.69-0.88)  |
| $RE_{Cr,winter}$     | 0.91(0.89-0.91) | 0.89(0.87-0.89) | 0.93(0.92-0.93) | 0.91(0.89-0.91) | 0.92(0.90-0.92) | 0.88(0.88-0.90)  | 0.92(0.92-0.93) | 0.90(0.89-0.91)  | 0.91(0.82-0.92)  |
| DE                   | 0.78(0.54-0.76) | 0.77(0.53-0.76) | 0.79(0.56-0.77) | 0.79(0.55-0.77) | 0.78(0.53-0.74) | 0.79(0.39-0.76)  | 0.78(0.51-0.73) | 0.78(0.27-0.72)  | 0.79(0.01-0.75)  |

Table S5. The performance metrics for the most balanced solution(out of the basket) and the the 5<sup>th</sup>-95<sup>th</sup> percentile of all performance metrics (inside of the basket) for two cases (Scenarios 1 – 2) with  $S_{\text{umax,WB}}$  are shown here.

|                      | Scenario 1      |                 |                 |                 |                 | Scenario 2      |                 |                 |                 |
|----------------------|-----------------|-----------------|-----------------|-----------------|-----------------|-----------------|-----------------|-----------------|-----------------|
|                      | T (1953-2022)   | t1 (1953-1972)  | t2 (1973-1992)  | t3 (1993-2012)  | t4 (2013-2022)  | t1 (1953-1972)  | t2 (1973-1992)  | t3 (1993-2012)  | t4 (2013-2022)  |
| $NSE_Q$              | 0.59(0.06-0.55) | 0.60(0.06-0.56) | 0.58(0.03-0.54) | 0.60(0.06-0.56) | 0.56(0.09-0.53) | 0.60(0.04-0.56) | 0.58(0.06-0.55) | 0.59(0.04-0.55) | 0.56(0.08-0.53) |
| $NSE_{\log(Q)}$      | 0.66(0.33-0.64) | 0.64(0.34-0.62) | 0.67(0.34-0.65) | 0.65(0.28-0.63) | 0.69(0.29-0.65) | 0.64(0.33-0.61) | 0.68(0.36-0.65) | 0.64(0.25-0.62) | 0.68(0.28-0.65) |
| $NSE_{FDC(\log(Q))}$ | 0.96(0.92-0.99) | 0.94(0.89-0.98) | 0.95(0.90-0.99) | 0.98(0.93-0.99) | 0.97(0.91-0.98) | 0.94(0.90-0.98) | 0.95(0.91-0.99) | 0.98(0.93-0.99) | 0.97(0.90-0.98) |
| $NSE_{Cr}$           | 0.89(0.87-0.91) | 0.85(0.83-0.88) | 0.91(0.88-0.93) | 0.90(0.88-0.92) | 0.91(0.87-0.91) | 0.85(0.83-0.88) | 0.91(0.89-0.93) | 0.90(0.88-0.92) | 0.91(0.87-0.91) |
| $NSE_{AC}$           | 0.98(0.60-0.97) | 0.93(0.40-0.96) | 0.98(0.56-0.96) | 0.97(0.60-0.98) | 0.84(0.16-0.91) | 0.91(0.37-0.96) | 0.98(0.53-0.96) | 0.96(0.58-0.98) | 0.85(0.21-0.92) |
| $RE_{Cr,summer}$     | 0.83(0.82-0.89) | 0.80(0.79-0.89) | 0.83(0.81-0.89) | 0.84(0.83-0.89) | 0.85(0.83-0.87) | 0.80(0.78-0.89) | 0.83(0.82-0.89) | 0.84(0.83-0.89) | 0.85(0.83-0.87) |
| $RE_{Cr,winter}$     | 0.91(0.90-0.91) | 0.89(0.88-0.89) | 0.93(0.92-0.93) | 0.91(0.89-0.91) | 0.92(0.90-0.92) | 0.90(0.88-0.89) | 0.93(0.92-0.93) | 0.91(0.89-0.91) | 0.92(0.90-0.92) |
| DE                   | 0.78(0.54-0.76) | 0.77(0.51-0.76) | 0.78(0.54-0.76) | 0.78(0.53-0.76) | 0.78(0.52-0.75) | 0.77(0.49-0.76) | 0.79(0.55-0.77) | 0.78(0.51-0.76) | 0.77(0.52-0.75) |

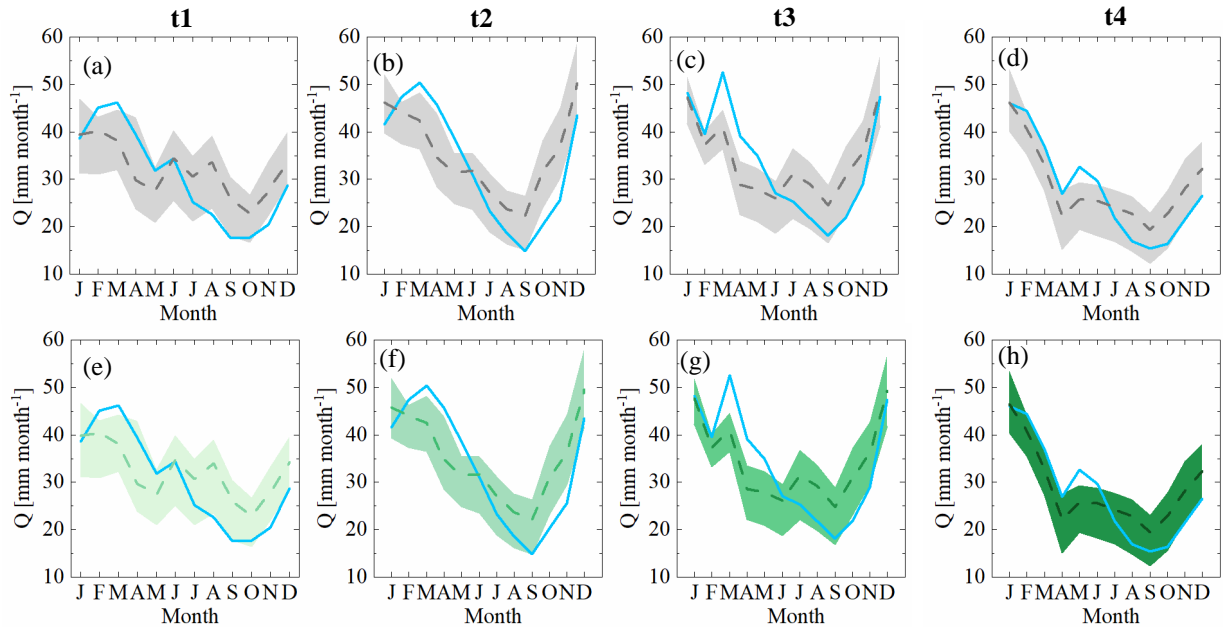

Figure S1. The mean monthly streamflow for four sub-time periods  $t_1$ - $t_4$  based on two scenarios ((a)-(d): scenario 1, (e)-(h): scenario 2). The blue lines indicate the observed streamflow. The dashed lines and shaded areas show the most balanced solution and 5<sup>th</sup>-95<sup>th</sup> percentiles based on the Pareto front solutions retained as feasible.

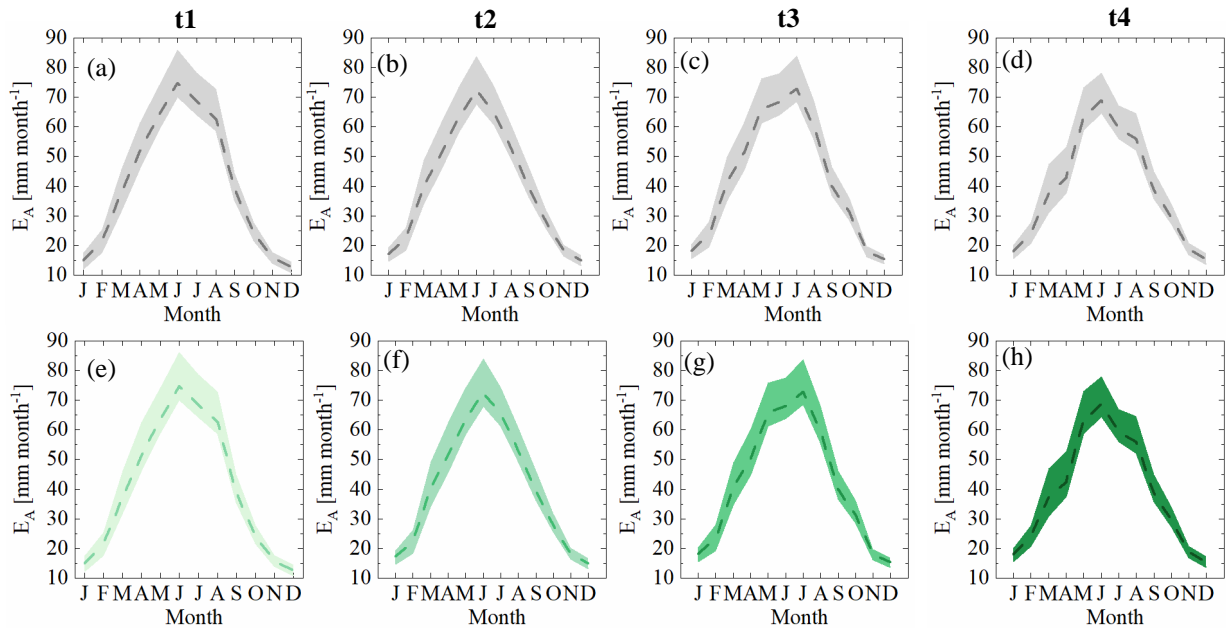

**Figure S2.** The mean monthly actual evaporation  $E_A$  for four sub-time periods  $t_1$ - $t_4$  based on two scenarios ((a)-(d): scenario 1, (e)-(h): scenario 2). The dashed lines and shaded areas show the most balanced solution and 5th–95th percentiles based on the pareto front solutions retained as feasible.

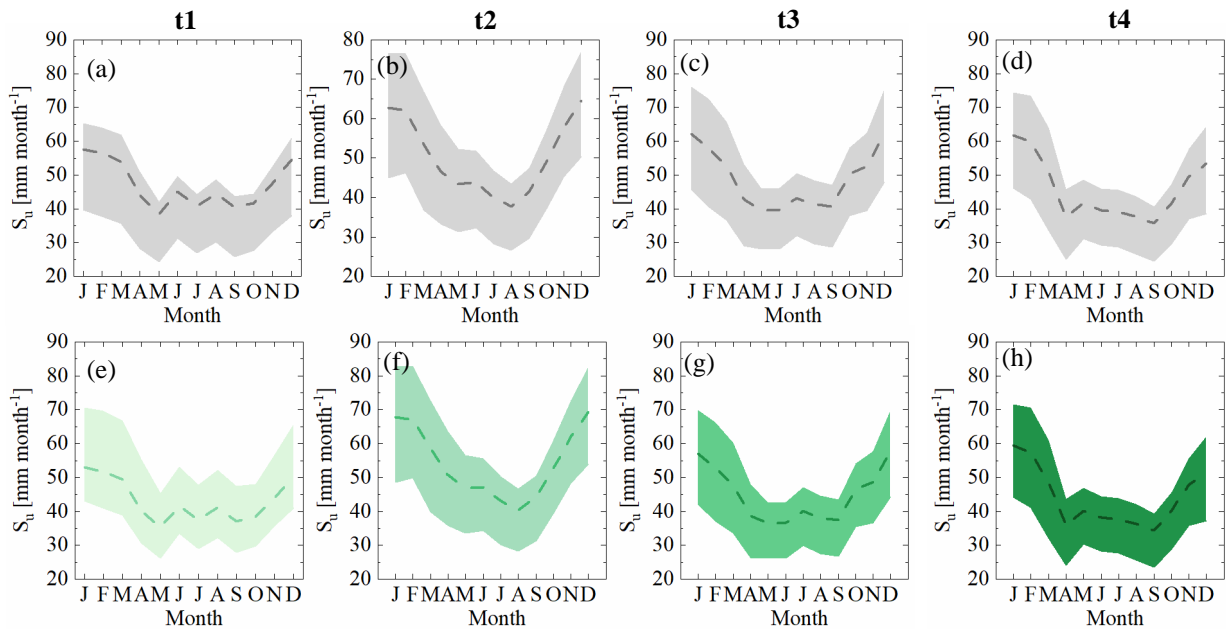

**Figure S3.** The mean monthly unsaturated zone storage  $S_u$  for four sub-time periods  $t_1$ - $t_4$  based on two scenarios ((a)-(d): scenario 1, (e)-(h): scenario 2). The dashed lines and shaded areas show the most balanced solution and 5th–95th percentiles based on the pareto front solutions retained as feasible.

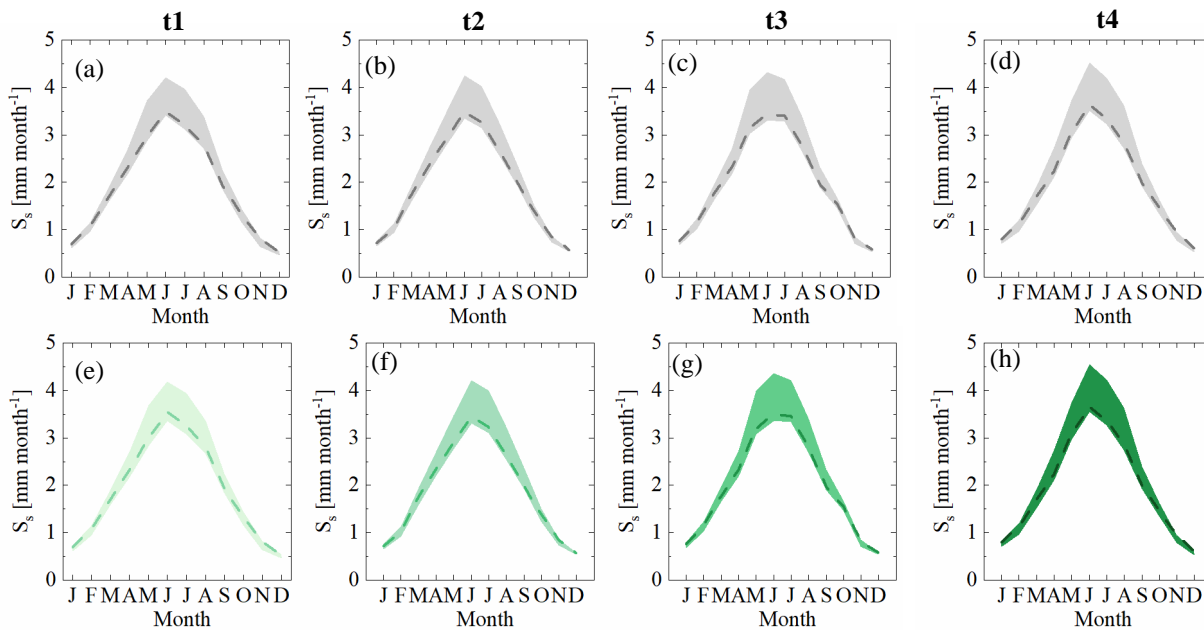

**Figure S4.** The mean monthly groundwater storage  $S_s$  (active storage) for four sub-time periods  $t_1$ – $t_4$  based on two scenarios ((a)–(d): scenario 1, (e)–(h): scenario 2). The dashed lines and shaded areas show the most balanced solution and 5th–95th percentiles based on the Pareto front solutions retained as feasible.

## References

- Gao, H., Ding, Y., Zhao, Q., Hrachowitz, M., and Savenije, H. H.: The importance of aspect for modelling the hydrological response in a glacier catchment in Central Asia, *Hydrol. Process.*, 31, 2842–2859, <https://doi.org/10.1002/hyp.11224>, 2017.
- Gao, H., Hrachowitz, M., Fenicia, F., Gharari, S., and Savenije, H.: Testing the realism of a topography-driven model (FLEX-Topo) in the nested catchments of the Upper Heihe, China, *Hydrol. Earth Syst. Sci.*, 18, 1895–1915, <https://doi.org/10.5194/hess-18-1895-2014>, 2014.
- Hrachowitz, M., Savenije, H., Bogaard, T., Tetzlaff, D., and Soulsby, C.: What can flux tracking teach us about water age distribution patterns and their temporal dynamics?, *Hydrol. Earth Syst. Sci.*, 17, 533–564, <https://doi.org/10.5194/hess-17-533-2013>, 2013.
- Hrachowitz, M., Stockinger, M., Coenders-Gerrits, M., van der Ent, R., Bogena, H., Lücke, A., and Stump, C.: Reduction of vegetation-accessible water storage capacity after deforestation affects catchment travel time distributions and increases young water fractions in a headwater catchment, *Hydrol. Earth Syst. Sci.*, 25, 4887–4915, <https://doi.org/10.5194/hess-25-4887-2021>, 2021.

Prenner, D., Kaitna, R., Mostbauer, K., and Hrachowitz, M.: The value of using multiple hydrometeorological variables to predict temporal debris flow susceptibility in an alpine environment, *Water Resour. Res.*, 54, 6822-6843, <https://doi.org/10.1029/2018WR022985>, 2018.
